# Supplementary material for: Transcription Elongation Factor A (SII) -Like (TCEAL) Gene Family Member-TCEAL2: A Novel Prognostic Marker in Pan-Cancer
Source: Research Square preprint supplement (doi:10.21203/rs.3.rs-1245319/v1), 2022-01-14
Supplement: Supplementary file 1 [file ed9be106615a628bceff2059.xlsx]

## Sheet: Sheet1
Table S2 Correlations between TCEAL2 expression and immune cells
Cancer	NK cells	Mast cells	TFH	Tgd	pDC	Eosinophils	NK CD56bright cells	B cells	Th1 cells	iDC	Macrophages	Tem	CD8 T cells	DC	Tcm	T helper cells	T cells	Cytotoxic cells	TReg	Th17 cells	NK CD56dim cells	aDC	Th2 cells	Neutrophils
ACC	-0.291/0.009	-0.025/0.827	-0.092/0.418	0.082/0.475	-0.046/0.688	-0.097/0.395	-0.148/0.192	-0.175/0.123	-0.111/0.331	-0.233/0.038	-0.212/0.060	-0.073/0.523	-0.269/0.017	-0.350/0.002	0.161/0.155	-0.191/0.092	-0.193/0.089	-0.180/0.112	-0.105/0.356	-0.105/0.356	-0.150/0.187	-0.276/0.014	-0.100/0.381	-0.195/0.086
BLCA	0.436/<0.001	0.392/<0.001	0.309/<0.001	0.084/0.087	0.158/0.001	0.325/<0.001	0.070/0.158	0.313/<0.001	0.161/0.001	0.139/0.005	0.181/<0.001	0.260/<0.001	0.082/0.097	0.075/0.127	-0.039/0.427	0.003/0.953	0.126/0.010	0.059/0.231	0.084/0.088	-0.157/0.001	-0.014/0.782	0.013/0.789	0.052/0.291	0.020/0.682
BRCA	0.155/<0.001	0.032/0.292	0.076/0.011	0.083/0.005	0.109/<0.001	-0.016/0.586	0.078/0.009	0.136/<0.001	0.053/0.079	0.035/0.242	0.015/0.619	0.013/0.673	0.094/0.002	0.074/0.013	-0.009/0.775	-0.036/0.229	0.048/0.107	0.053/0.075	-0.046/0.127	-0.028/0.349	0.020/0.505	-0.004/0.897	-0.160/<0.001	0.009/0.753
CESC	0.403/<0.001	0.276/<0.001	0.181/0.001	-0.094/0.101	0.219/<0.001	0.231/<0.001	0.010/0.866	0.112/0.050	-0.021/0.710	0.207/<0.001	0.119/0.038	0.186/0.001	0.062/0.277	0.058/0.308	0.027/0.642	-0.032/0.573	-0.002/0.977	-0.028/0.620	0.030/0.603	-0.093/0.104	-0.102/0.076	-0.086/0.134	0.036/0.530	-0.125/0.029
CHOL	0.053/0.759	0.567/<0.001	0.492/0.002	0.101/0.559	0.448/0.006	0.708/<0.001	-0.114/0.507	0.435/0.008	0.428/0.009	0.293/0.082	0.405/0.014	0.349/0.037	0.329/0.050	0.337/0.044	0.282/0.095	0.414/0.012	0.444/0.007	0.391/0.019	0.389/0.019	-0.003/0.988	0.191/0.265	0.246/0.148	0.128/0.458	-0.067/0.697
COAD	0.362/<0.001	0.411/<0.001	0.256/<0.001	0.302/<0.001	0.201/<0.001	0.160/<0.001	0.020/0.669	0.180/<0.001	0.174/<0.001	0.252/<0.001	0.287/<0.001	0.205/<0.001	0.083/0.070	0.153/<0.001	0.134/0.003	0.041/0.371	0.100/0.028	0.105/0.021	0.151/<0.001	-0.246/<0.001	0.034/0.453	0.071/0.118	-0.061/0.186	0.073/0.108
DLBC	0.032/0.830	0.118/0.424	0.201/0.172	0.137/0.352	-0.223/0.127	-0.042/0.777	0.151/0.304	0.042/0.776	-0.066/0.657	-0.086/0.561	0.050/0.735	-0.404/0.004	-0.149/0.314	0.038/0.795	-0.234/0.109	-0.214/0.144	-0.200/0.173	-0.095/0.520	-0.158/0.282	-0.012/0.938	0.071/0.632	-0.056/0.707	-0.139/0.344	-0.053/0.720
ESCA	0.674/<0.001	0.423/<0.001	0.353/<0.001	0.059/0.453	0.267/<0.001	0.231/0.003	-0.124/0.117	0.240/0.002	0.221/0.005	0.372/<0.001	0.337/<0.001	0.207/0.008	0.249/0.001	0.376/<0.001	0.296/<0.001	0.317/<0.001	0.268/<0.001	0.277/<0.001	0.241/0.002	-0.210/0.007	0.113/0.151	0.164/0.037	0.090/0.254	0.012/0.876
GBM	-0.252/<0.001	0.023/0.768	0.348/<0.001	0.339/<0.001	0.115/0.135	-0.022/0.776	-0.013/0.868	0.068/0.377	-0.092/0.233	-0.166/0.031	-0.207/0.007	-0.166/0.031	-0.078/0.314	-0.321/<0.001	-0.065/0.402	-0.151/0.050	-0.226/0.003	-0.215/0.005	-0.165/0.032	-0.047/0.545	-0.178/0.021	-0.220/0.004	-0.112/0.147	-0.184/0.017
HNSC	0.144/0.001	0.115/0.010	0.121/0.007	-0.098/0.028	0.078/0.080	0.081/0.071	0.243/<0.001	0.154/<0.001	-0.050/0.260	-0.038/0.397	0.058/0.197	0.121/0.007	0.066/0.139	-0.032/0.469	-0.082/0.065	0.023/0.613	-0.005/0.910	-0.033/0.461	-0.061/0.175	-0.046/0.304	-0.116/0.009	-0.115/0.010	-0.067/0.135	-0.118/0.008
KICH	-0.016/0.898	0.055/0.665	0.106/0.399	-0.179/0.154	0.159/0.206	0.155/0.217	-0.048/0.702	0.089/0.480	0.052/0.683	-0.033/0.797	0.093/0.462	-0.028/0.822	-0.177/0.159	0.009/0.945	-0.045/0.719	0.043/0.733	0.004/0.972	-0.124/0.323	0.075/0.552	0.081/0.520	-0.168/0.182	-0.122/0.333	0.315/0.011	-0.265/0.033
KIRC	0.234/<0.001	0.179/<0.001	0.077/0.073	0.079/0.066	0.121/0.005	-0.134/0.002	-0.067/0.120	0.010/0.817	-0.063/0.142	0.063/0.146	-0.079/0.067	-0.009/0.836	0.046/0.290	0.057/0.188	-0.063/0.146	-0.064/0.141	-0.159/<0.001	-0.143/<0.001	-0.198/<0.001	0.037/0.387	-0.018/0.682	-0.191/<0.001	-0.133/0.002	-0.123/0.004
KIRP	0.280/<0.001	-0.019/0.748	0.098/0.097	0.201/<0.001	0.074/0.212	-0.007/0.901	0.030/0.617	0.017/0.771	0.099/0.093	0.013/0.826	-0.018/0.757	0.081/0.168	-0.004/0.943	-0.034/0.562	0.149/0.011	0.196/<0.001	-0.020/0.738	-0.113/0.054	-0.009/0.880	0.079/0.183	-0.052/0.375	-0.057/0.336	-0.049/0.408	-0.182/0.002
LAML	0.172/0.034	0.020/0.811	0.180/0.027	0.076/0.351	-0.032/0.692	-0.101/0.216	0.008/0.922	0.136/0.097	0.251/0.002	-0.060/0.463	0.007/0.930	0.003/0.972	0.237/0.003	-0.022/0.791	0.137/0.094	0.231/0.004	0.212/0.009	0.262/0.001	0.002/0.978	0.009/0.913	0.147/0.071	-0.023/0.784	0.113/0.167	-0.046/0.575
LGG	-0.315/<0.001	0.058/0.183	0.205/<0.001	0.090/0.038	0.218/<0.001	-0.347/<0.001	0.226/<0.001	-0.006/0.893	0.056/0.197	-0.116/0.008	-0.363/<0.001	-0.060/0.170	0.128/0.003	0.148/<0.001	-0.119/0.006	-0.361/<0.001	-0.252/<0.001	-0.191/<0.001	0.145/<0.001	-0.191/<0.001	-0.135/0.002	-0.216/<0.001	-0.380/<0.001	-0.289/<0.001
LIHC	-0.048/0.353	0.032/0.538	0.133/0.010	0.179/<0.001	-0.144/0.005	0.065/0.208	0.169/0.001	0.067/0.199	0.144/0.005	0.064/0.214	0.024/0.641	0.007/0.889	0.070/0.176	-0.018/0.733	-0.013/0.800	0.179/<0.001	0.092/0.075	0.048/0.357	-0.041/0.425	-0.044/0.391	0.007/0.900	0.047/0.368	0.045/0.390	-0.048/0.351
LUAD	0.312/<0.001	0.270/<0.001	0.168/<0.001	-0.046/0.285	0.171/<0.001	0.244/<0.001	0.106/0.014	0.113/0.009	0.094/0.029	0.216/<0.001	0.169/<0.001	0.012/0.784	0.085/0.051	0.183/<0.001	0.020/0.652	0.064/0.137	0.074/0.086	0.058/0.178	0.022/0.607	-0.094/0.029	-0.062/0.151	0.047/0.281	-0.195/<0.001	0.142/<0.001
LUSC	0.131/0.003	0.034/0.453	0.115/0.010	-0.064/0.149	-0.031/0.485	0.090/0.043	0.170/<0.001	-0.020/0.657	-0.119/0.008	-0.097/0.030	-0.059/0.185	0.025/0.571	0.030/0.498	-0.108/0.016	-0.149/<0.001	0.048/0.281	-0.063/0.157	-0.133/0.003	-0.129/0.004	-0.055/0.218	-0.224/<0.001	-0.178/<0.001	-0.079/0.078	-0.165/<0.001
MESO	0.137/0.209	0.253/0.019	-0.108/0.323	-0.043/0.692	0.095/0.386	0.130/0.232	0.142/0.192	0.089/0.416	0.076/0.487	0.003/0.981	-0.017/0.876	-0.019/0.859	0.103/0.345	0.192/0.076	-0.110/0.311	-0.317/0.003	-0.046/0.677	0.162/0.135	-0.107/0.326	0.174/0.110	0.096/0.379	0.098/0.371	-0.529/<0.001	-0.037/0.738
OV	0.238/<0.001	0.106/0.039	0.205/<0.001	0.117/0.023	0.006/0.903	0.060/0.244	-0.172/<0.001	0.020/0.692	-0.057/0.270	0.009/0.855	0.022/0.666	0.019/0.711	-0.051/0.319	-0.101/0.048	-0.024/0.639	0.060/0.243	-0.112/0.030	-0.192/<0.001	-0.099/0.055	-0.081/0.115	-0.126/0.014	-0.157/0.002	0.080/0.122	-0.063/0.219
PAAD	0.029/0.704	0.261/<0.001	0.328/<0.001	0.232/0.002	0.265/<0.001	0.235/0.002	0.112/0.136	-0.014/0.856	-0.140/0.062	-0.074/0.328	-0.287/<0.001	-0.061/0.415	-0.095/0.206	-0.108/0.150	0.007/0.929	-0.095/0.209	-0.011/0.887	-0.005/0.948	-0.183/0.014	0.102/0.175	-0.284/<0.001	-0.186/0.013	-0.480/<0.001	-0.152/0.043
PCPG	-0.194/0.008	-0.145/0.050	-0.044/0.555	0.144/0.052	-0.144/0.052	-0.277/<0.001	0.232/0.002	-0.028/0.709	0.124/0.095	-0.098/0.189	-0.205/0.005	-0.106/0.151	-0.091/0.219	-0.145/0.049	0.162/0.028	-0.119/0.109	-0.113/0.127	-0.113/0.129	0.238/0.001	0.038/0.610	-0.259/<0.001	-0.056/0.455	-0.148/0.046	-0.232/0.002
PRAD	0.719/<0.001	0.569/<0.001	0.149/<0.001	0.397/<0.001	0.400/<0.001	0.289/<0.001	0.252/<0.001	0.362/<0.001	0.494/<0.001	0.414/<0.001	0.251/<0.001	0.378/<0.001	0.262/<0.001	0.370/<0.001	-0.076/0.090	0.056/0.210	0.320/<0.001	0.378/<0.001	-0.020/0.653	0.168/<0.001	0.228/<0.001	0.092/0.039	-0.157/<0.001	0.470/<0.001
READ	0.574/<0.001	0.256/<0.001	0.168/0.030	0.219/0.005	0.216/0.005	0.205/0.008	-0.065/0.407	-0.037/0.635	0.225/0.003	0.274/<0.001	0.349/<0.001	0.159/0.040	0.095/0.224	0.134/0.085	0.097/0.211	0.031/0.692	0.015/0.846	0.087/0.263	0.021/0.786	-0.310/<0.001	-0.014/0.852	0.074/0.345	-0.031/0.689	0.014/0.856
SARC	0.338/<0.001	0.160/0.009	-0.422/<0.001	0.296/<0.001	0.094/0.128	-0.130/0.035	0.088/0.156	-0.079/0.199	-0.392/<0.001	-0.288/<0.001	-0.412/<0.001	-0.207/<0.001	-0.343/<0.001	-0.189/0.002	-0.115/0.063	-0.142/0.021	-0.208/<0.001	-0.200/0.001	-0.265/<0.001	-0.043/0.492	-0.289/<0.001	-0.240/<0.001	-0.104/0.092	-0.365/<0.001
SKCM	0.031/0.496	-0.024/0.600	0.117/0.011	0.087/0.060	0.076/0.099	0.054/0.239	0.088/0.057	0.099/0.032	-0.014/0.756	-0.028/0.542	-0.061/0.185	0.014/0.767	0.121/0.009	-0.050/0.277	0.116/0.012	0.115/0.012	0.035/0.452	-0.008/0.864	0.025/0.590	0.054/0.238	-0.005/0.906	-0.012/0.796	0.006/0.901	-0.060/0.197
STAD	0.675/<0.001	0.442/<0.001	0.261/<0.001	0.311/<0.001	0.388/<0.001	0.198/<0.001	-0.009/0.859	0.220/<0.001	0.009/0.864	0.170/<0.001	0.189/<0.001	0.259/<0.001	0.186/<0.001	0.176/<0.001	0.244/<0.001	-0.079/0.129	0.141/0.006	0.135/0.009	-0.112/0.030	-0.277/<0.001	-0.101/0.050	-0.148/0.004	-0.362/<0.001	-0.136/0.009
TGCT	0.623/<0.001	0.527/<0.001	-0.021/0.793	0.612/<0.001	0.169/0.034	0.114/0.155	0.536/<0.001	-0.376/<0.001	0.022/0.785	0.220/0.006	0.260/0.001	-0.332/<0.001	-0.027/0.742	0.129/0.108	-0.498/<0.001	-0.477/<0.001	-0.373/<0.001	-0.395/<0.001	-0.410/<0.001	-0.192/0.016	-0.211/0.008	-0.364/<0.001	-0.054/0.504	-0.081/0.314
THCA	-0.080/0.071	-0.153/<0.001	0.116/0.009	0.036/0.414	0.083/0.062	-0.113/0.010	0.184/<0.001	0.023/0.607	-0.150/<0.001	-0.198/<0.001	-0.199/<0.001	-0.153/<0.001	0.083/0.061	-0.265/<0.001	-0.178/<0.001	-0.084/0.059	0.000/0.997	-0.037/0.398	-0.159/<0.001	0.079/0.075	-0.022/0.622	-0.200/<0.001	-0.210/<0.001	-0.203/<0.001
THYM	0.121/0.190	0.102/0.268	-0.181/0.049	-0.148/0.109	0.061/0.513	-0.024/0.797	-0.137/0.138	-0.279/0.002	-0.085/0.361	-0.026/0.782	-0.037/0.689	-0.028/0.762	-0.287/0.002	-0.331/<0.001	0.029/0.752	-0.130/0.159	-0.255/0.005	-0.190/0.038	-0.166/0.070	-0.177/0.054	-0.275/0.002	-0.117/0.207	-0.392/<0.001	-0.007/0.938
UCEC	0.182/<0.001	0.055/0.194	0.071/0.095	0.031/0.471	-0.031/0.468	0.039/0.357	-0.183/<0.001	0.018/0.669	0.036/0.402	-0.026/0.535	0.074/0.082	0.006/0.880	0.068/0.109	-0.031/0.463	-0.028/0.516	0.089/0.036	-0.060/0.162	-0.075/0.077	-0.062/0.148	-0.063/0.139	-0.077/0.071	-0.052/0.220	0.145/<0.001	-0.218/<0.001
UCS	0.336/0.011	0.095/0.487	0.280/0.037	0.307/0.021	-0.127/0.353	-0.017/0.899	0.038/0.784	-0.100/0.464	-0.142/0.295	-0.011/0.935	-0.021/0.877	0.106/0.437	-0.396/0.003	-0.207/0.127	-0.057/0.676	0.280/0.037	-0.211/0.119	-0.362/0.006	0.018/0.895	-0.013/0.926	-0.196/0.148	-0.063/0.646	0.100/0.463	-0.293/0.028
UVM	0.243/0.030	0.474/<0.001	0.374/<0.001	0.528/<0.001	-0.081/0.476	0.319/0.004	0.344/0.002	-0.018/0.873	0.178/0.115	0.152/0.178	0.389/<0.001	0.013/0.910	-0.080/0.481	0.013/0.909	0.183/0.104	0.094/0.408	0.095/0.403	-0.033/0.769	-0.153/0.174	-0.144/0.203	0.027/0.812	-0.030/0.790	0.026/0.818	0.069/0.546
Left number means correlation coefficient; Right number means p value.
