# Supplementary material for: Transcription Elongation Factor A (SII) -Like (TCEAL) Gene Family Member-TCEAL2: A Novel Prognostic Marker in Pan-Cancer
Source: Research Square preprint supplement (doi:10.21203/rs.3.rs-1245319/v1), 2022-01-14
Supplement: Supplementary file 2 [file f1638498719b13a51fbb19a4.xlsx]

## Sheet: Sheet1
		Table S4 The information of 9 cancer types of GEO data
		Cancer types	GSE data	Cancer samples	Normal samples	Platform
		breast cancer	GSE54002	417	16	GPL570 [HG-U133_Plus_2] Affymetrix Human Genome U133 Plus 2.0 Array
		cervical cancer	GSE9750	33	24	GPL96 [HG-U133A] Affymetrix Human Genome U133A Array
		colorectal cancer	GSE41258	186	54	GPL96 [HG-U133A] Affymetrix Human Genome U133A Array
		gastric cancer	GSE26899	96	12	GPL6947 Illumina HumanHT-12 V3.0 expression beadchip
		lung cancer	GSE32863	58	58	GPL6884 Illumina HumanWG-6 v3.0 expression beadchip
		ovarian cancer	GSE6008	99	4	GPL96 [HG-U133A] Affymetrix Human Genome U133A Array
		prostate cancer	GSE70768	126	73	GPL10558 Illumina HumanHT-12 V4.0 expression beadchip
		renal cancer	GSE53757	72	72	GPL570 [HG-U133_Plus_2] Affymetrix Human Genome U133 Plus 2.0 Array
		thyroid cancer	GSE33630	60	45	GPL570 [HG-U133_Plus_2] Affymetrix Human Genome U133 Plus 2.0 Array
